# Supplementary material
Source: Royal Society of Chemistry journal article supplement (doi:10.1039/d5en00967g)
Supplement: d5en00967g1.pdf [file d5en00967g1.pdf]

## Supporting material

### Co-exposure to a high-fat diet and nanoplastics synergistically exacerbates intestinal microbiota dysbiosis and susceptibility

Baoyi Tan<sup>a</sup>, Lei He<sup>b</sup>, Zijie Wu<sup>a</sup>, Ruikun Sun<sup>a</sup>, Zhenqing Dai<sup>a</sup> and Chengyong Li<sup>a, b\*</sup>

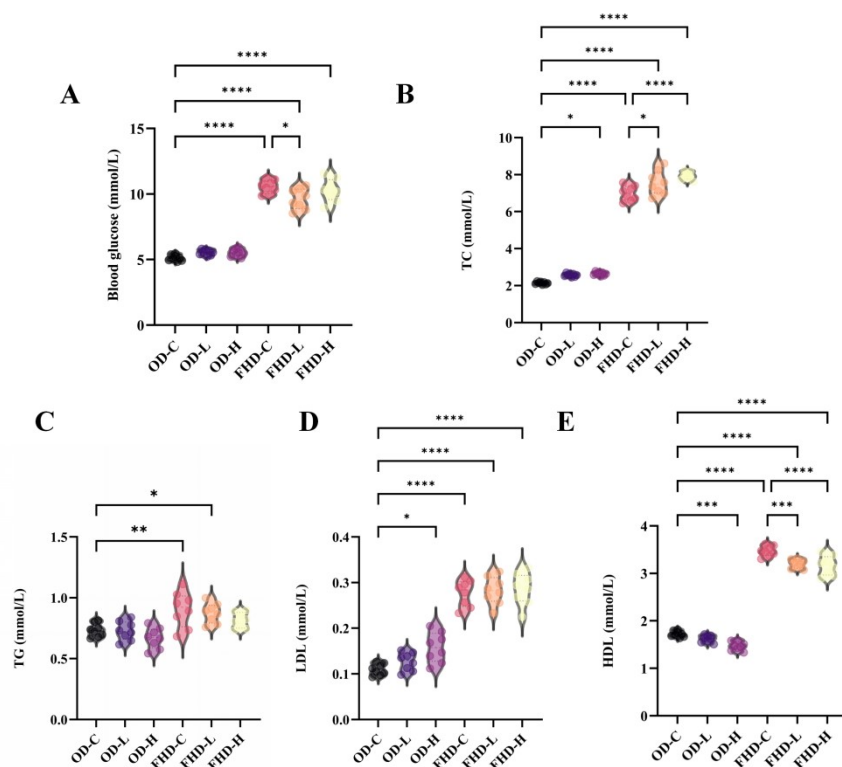

Fig S1. Blood parameters metabolic markers. (A) Blood glucose, (B) Total cholesterol (TC), (C) Triglyceride (TG), (D) Low density lipoprotein (LDL), (E) High density lipoprotein (HDL). One-way ANOVA analysis of variance was conducted \* Indicates a statistically significant difference ( $P < 0.05$ ). \*\* indicates a highly statistically significant difference ( $P < 0.01$ ). \*\*\* indicates a extremely statistically significant ( $P < 0.001$ ). \*\*\*\* indicates a extremely statistically significant ( $P < 0.0001$ ).

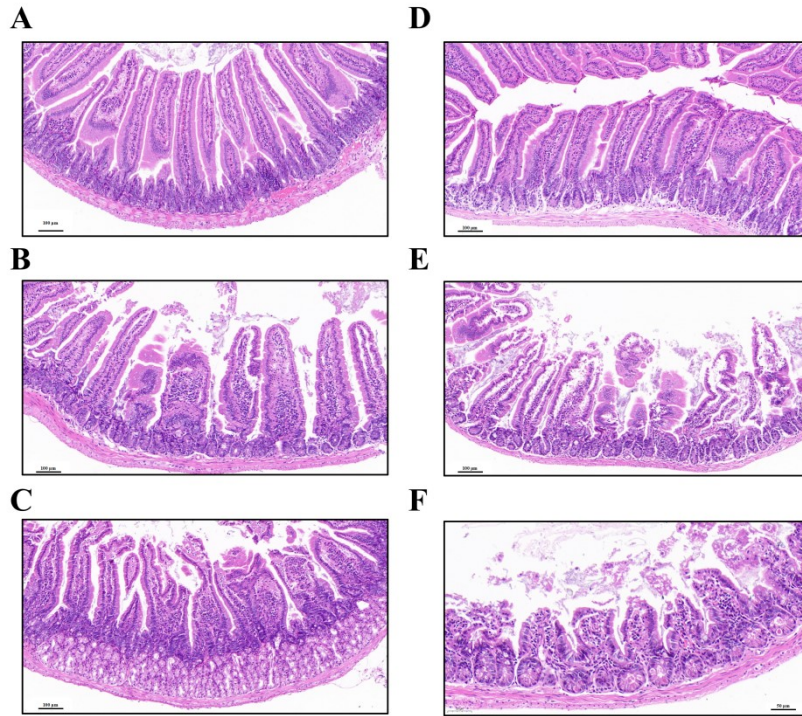

Fig S2. The H&E staining results of the intestinal tissue. (A) OD-C group, (B) OD-L group, (C) OD-H group, (D) HFD-C group, (E) HFD-L group, (F) HFD-H group.

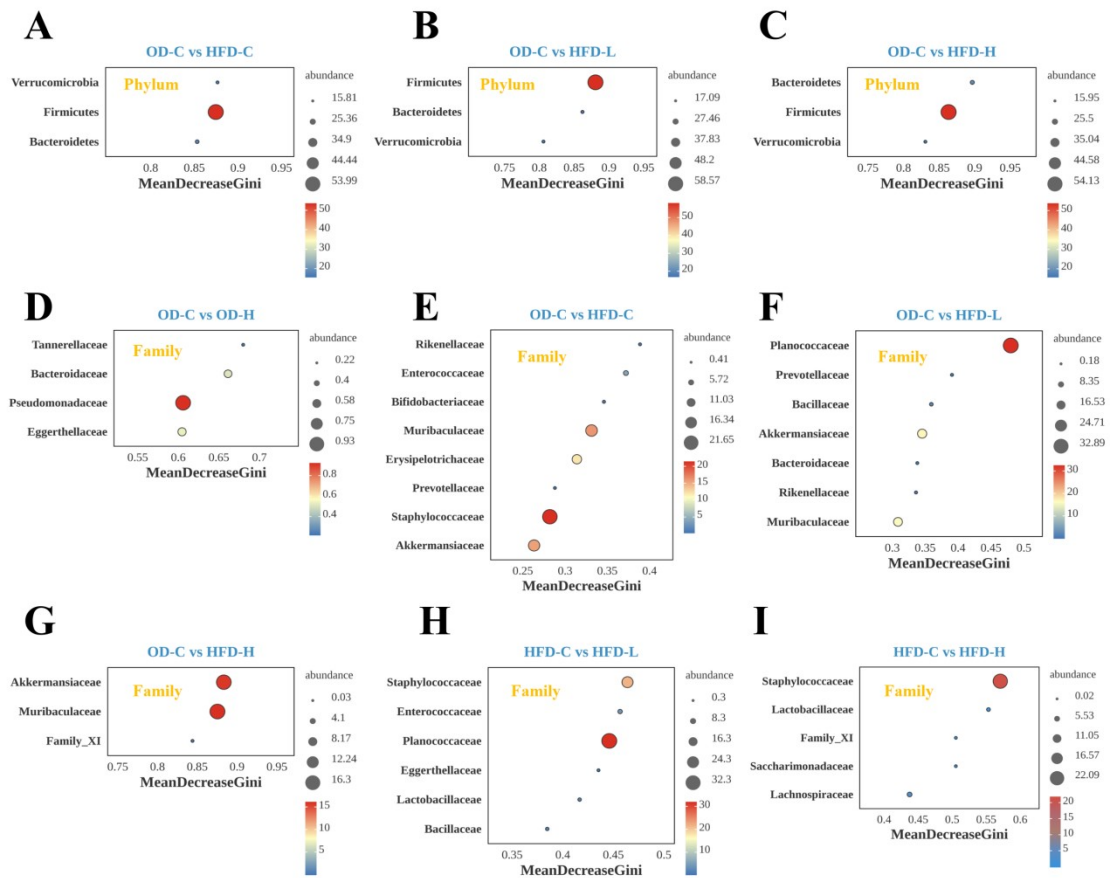

**Fig S3.** Random forest analysis of intestinal flora composition in different experimental groups. Phylum lever random forest analysis of (A) OD-C VS HFD-C, (B) OD-C VS HFD-L, (C) OD-C VS HFD-H. Family lever random forest analysis of (D) OD-C VS OD-H, (E) OD-C VS HFD-C, (F) OD-C VS HFD-L, (G) OD-C VS HFD-H, (H) HFD-C VS HFD-L, (I) HFD-C VS HFD-H.

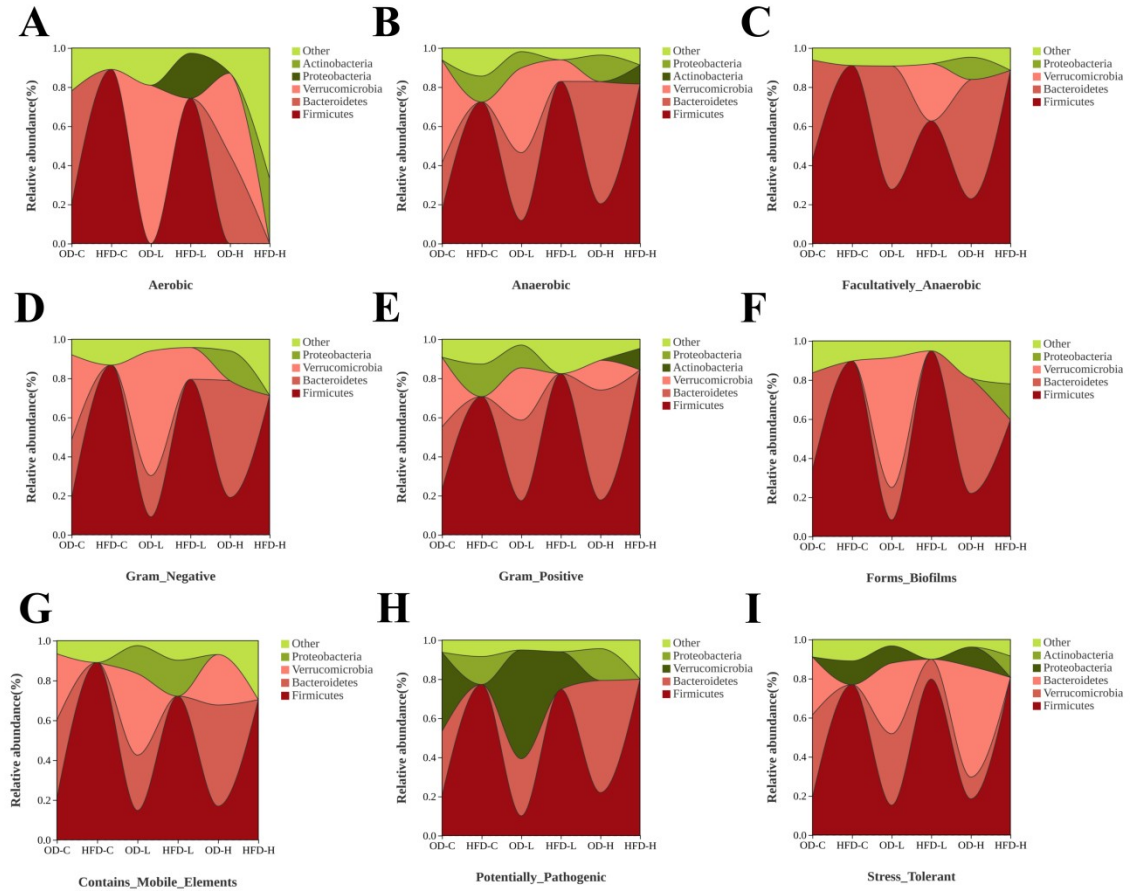

**Fig S4.** Analysis of intestinal microbial phenotypic differences. Phenotypic abundance river plot of (A) Aerobic, (B) Anaerobic, (C) Facultatively anaerobic, (D) Gram negative, (E) Gram positive, (F) Forms biofilms, (G) Contains mobile elements, (H) Potentially pathogenic, (I) Stress tolerant.

**Table S1 Diet composition table of different experimental groups**

| Groups | PS      | Crude_protein | Crude_fat | Crude_fibre | Crude_ash | Protein                  | Fat  | Carbohydrate |
|--------|---------|---------------|-----------|-------------|-----------|--------------------------|------|--------------|
|        | (mg/kg) | (%)           | (%)       | (%)         | (%)       | Contribute rate (kcal %) |      |              |
| OD-C   | 0       | 18            | 4         | 5           | 8         | 24.2                     | 12.4 | 63.4         |
| OD-L   | 10      | 18            | 4         | 5           | 8         | 24.2                     | 12.4 | 63.4         |
| OD-H   | 100     | 18            | 4         | 5           | 8         | 24.2                     | 12.4 | 63.4         |
| HFD-C  | 0       | 23.656        | 23.597    | 5.826       | 5.244     | 20                       | 45   | 35           |
| HFD-L  | 10      | 23.656        | 23.597    | 5.826       | 5.244     | 20                       | 45   | 35           |
| HFD-H  | 100     | 23.656        | 23.597    | 5.826       | 5.244     | 20                       | 45   | 35           |

**Table S2. Sequence list of primers in mice**

| Primer name   | Primer sequence                                       |
|---------------|-------------------------------------------------------|
| Mus-Gapdh     | F:TACCCCAATGTGTCCGTC<br>R:AAGAGTGGGAGTTGCTGTTGAAG     |
| Actb          | F:GTGACGTTGACATCCGTAAAGA<br>R:GCCGGACTCATCGTACTCC     |
| Occludin      | F:TGAAAGTCCACCTCCTTACAGA<br>R:CCGGATAAAAAGAGTACGCTGG  |
| Muc2          | F:ATGCCACCTCCTCAAAGAC<br>R:GTAGTTTCCGTTGGAACAGTGAA    |
| Reg3a         | F:TCACCTGGTCCTCAACAGTATT<br>R:GGAGCGATAAGCCTTGTAACC   |
| Reg3b         | F:ACTCCCTGAAGAATATACCCTCC<br>R:CGCTATTGAGCACAGATACGAG |
| TNF- $\alpha$ | F:CAGGCGGTGCCTATGTCTC<br>R:CGATCACCCCGAAGTTCAGTAG     |
| IL-6          | F:CTGCAAGAGACTTCCATCCAG<br>R:AGTGGTATAGACAGGTCTGTTGG  |
| IL-10         | F:CTTACTGACTGGCATGAGGATCA<br>R:GCAGCTCTAGGAGCATGTGG   |
